CORRECTION

# Correction: Detecting Fragmentation Extinction Thresholds for Forest Understory Plant Species in Peninsular Spain

The *PLOS ONE* Staff

In the Funding section, the grant number from funder Ministry of Economy and Competitiveness of Spain is listed incorrectly. The correct grant number is: CGL2013-48768-P. The publisher apologizes for the error. The correct funding information is as follows: This study was sponsored by a research grant from the Ministry of Economy and Competitiveness of Spain (CGL2013-48768-P to MÁR). MR was funded by the Spanish Ministry for Education and Science (BVA-2010-0596). IM-C was funded by the Integrated Program of IC&DT (No. 1/SAESCTN/ALENT-07-0224-FEDER-001755). The funders had no role in study design, data collection and analysis, decision to publish, or preparation of the manuscript.

## Reference

1. Rueda M, Moreno Saiz JC, Morales-Castilla I, Albuquerque FS, Ferrero M, Rodríguez MÁ (2015) Detecting Fragmentation Extinction Thresholds for Forest Understory Plant Species in Peninsular Spain. *PLoS ONE* 10(5): e0126424. doi: [10.1371/journal.pone.0126424](https://doi.org/10.1371/journal.pone.0126424) PMID: [25978329](https://pubmed.ncbi.nlm.nih.gov/25978329/)

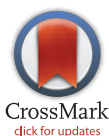

## OPEN ACCESS

**Citation:** The *PLOS ONE* Staff (2015) Correction: Detecting Fragmentation Extinction Thresholds for Forest Understory Plant Species in Peninsular Spain. *PLoS ONE* 10(7): e0132199. doi:10.1371/journal.pone.0132199

**Published:** July 1, 2015

**Copyright:** © 2015 The PLOS ONE Staff. This is an open access article distributed under the terms of the [Creative Commons Attribution License](https://creativecommons.org/licenses/by/4.0/), which permits unrestricted use, distribution, and reproduction in any medium, provided the original author and source are credited.
